# Supplementary material for: Facile preparation of albumin-stabilized gold nanostars for the targeted photothermal ablation of cancer cells
Source: Royal Society of Chemistry journal article supplement (doi:10.1039/c5tb00633c), 2015-01-01
Supplement: c5tb00633c1.pdf [file c5tb00633c1.pdf]

## Electronic Supporting Information

# **Facile preparation of albumin-stabilized gold nanostars for targeted photothermal ablation of cancer cells**

Jingchao Li<sup>a, b</sup>, Rong Cai<sup>a, b</sup>, Naoki Kawazoe<sup>a</sup>, and Guoping Chen<sup>\*, a, b</sup>

<sup>a</sup> Tissue Regeneration Materials Unit, International Center for Materials Nanoarchitectonics, National Institute for Materials Science, 1-1 Namiki, Tsukuba, Ibaraki 305-0044, Japan

<sup>b</sup> Department of Materials Science and Engineering, Graduate School of Pure and Applied Sciences, University of Tsukuba, 1-1-1 Tennodai, Tsukuba, Ibaraki 305-8577, Japan

\* Corresponding author.

Tel: +81-29-860-4496, Fax: +81-29-860-4714, E-mail: Guoping.CHEN@nims.go.jp.

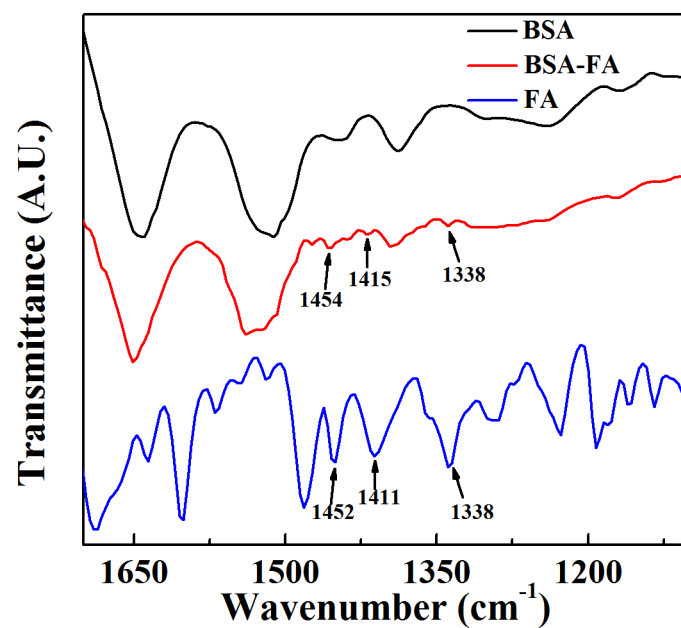

**Fig. S1** FTIR spectra of BSA, BSA-FA conjugation and FA.

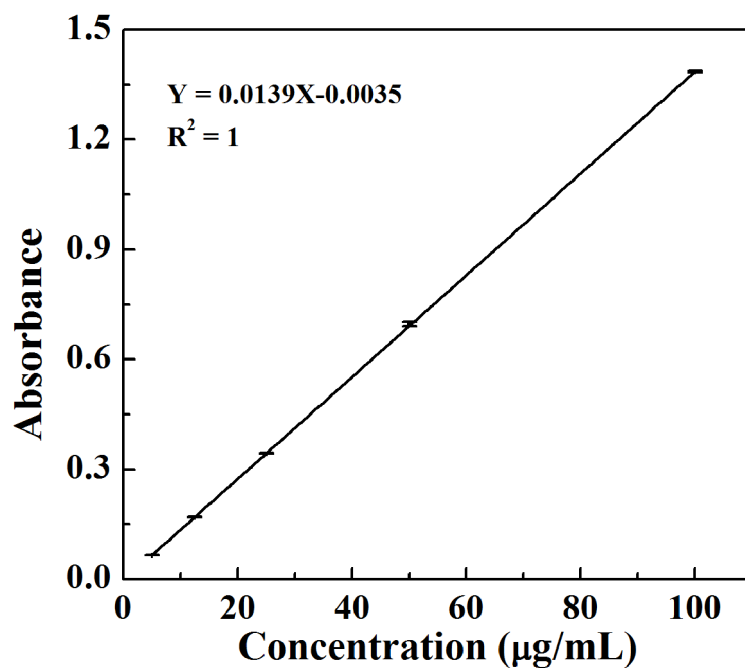

**Fig. S2** Calibration curve of FA absorption at 365 nm versus the FA concentration.

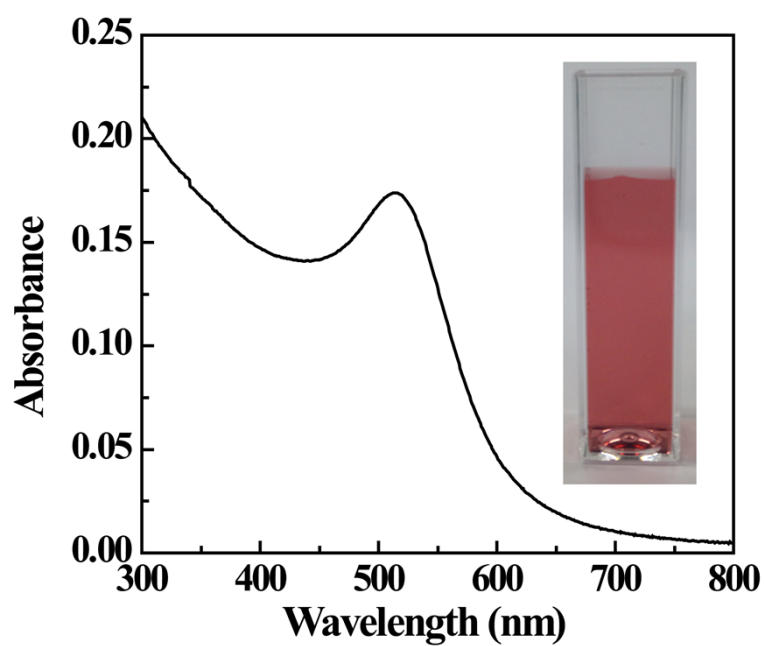

**Fig. S3** UV-Vis spectroscopy of trisodium citrate-stabilized Au seeds (insert is the photo of Au seeds solution).

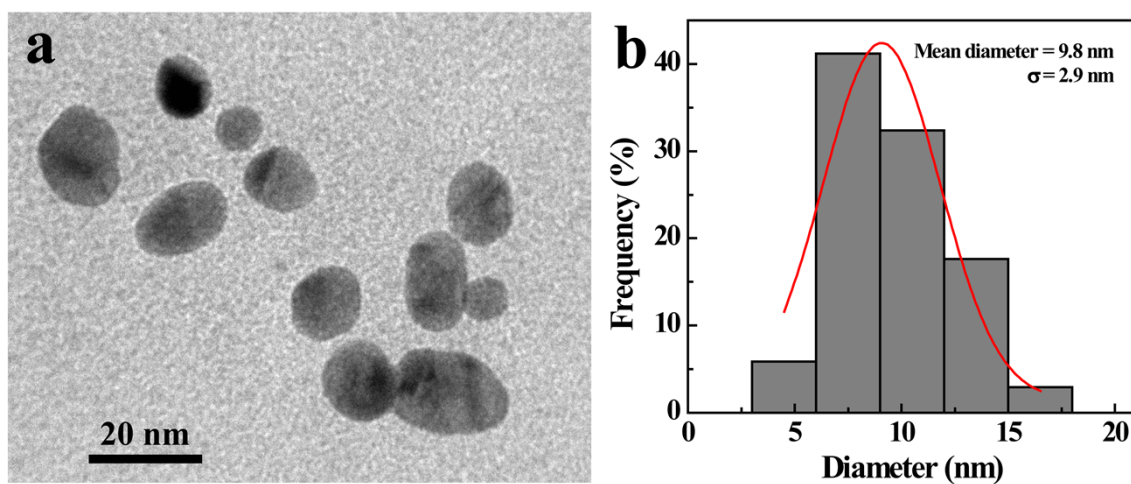

**Fig. S4** TEM image (a) and size distribution histogram (b) of trisodium citrate-stabilized Au seeds.

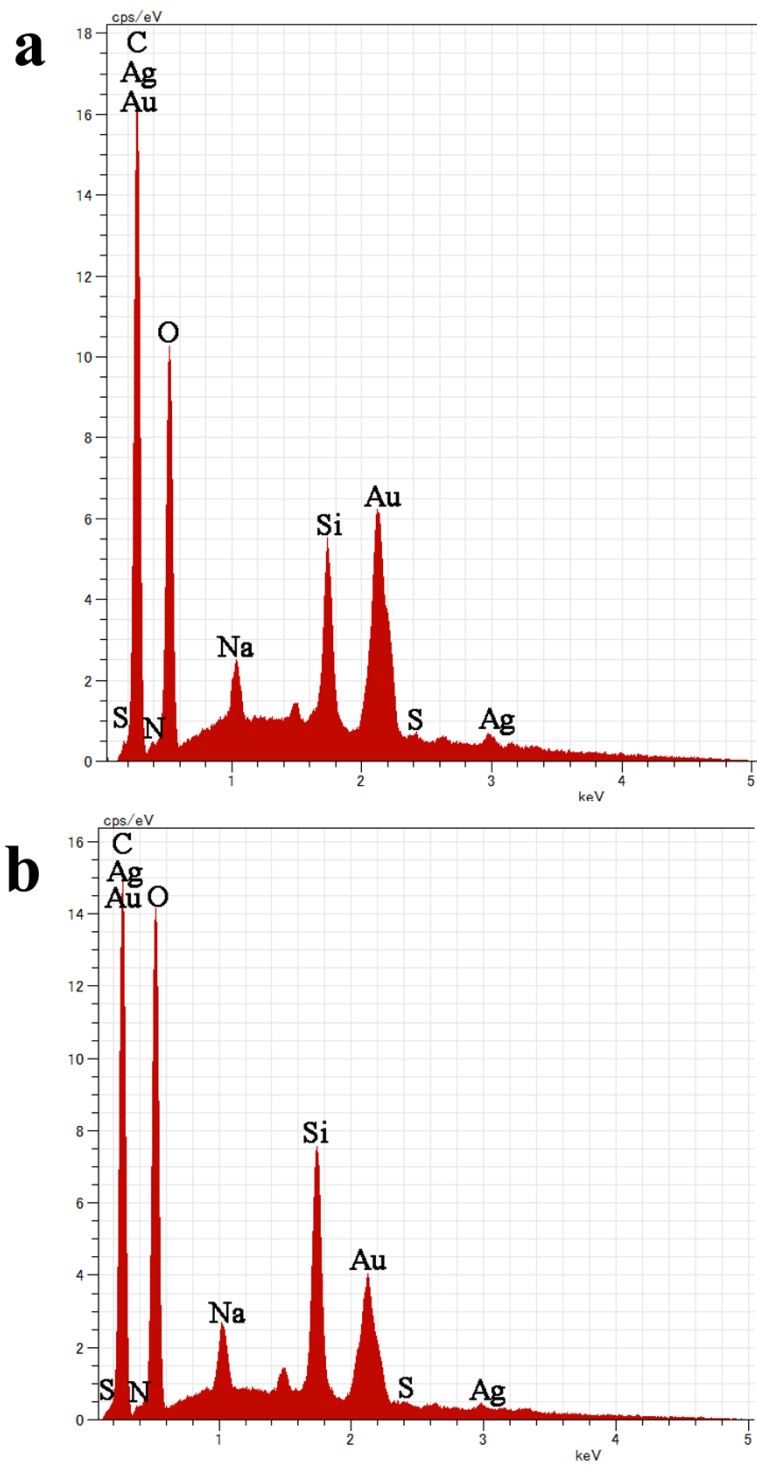

**Fig. S5** EDS spectra of BSA-AuNSs (a) and BSA-FA-AuNSs (b).

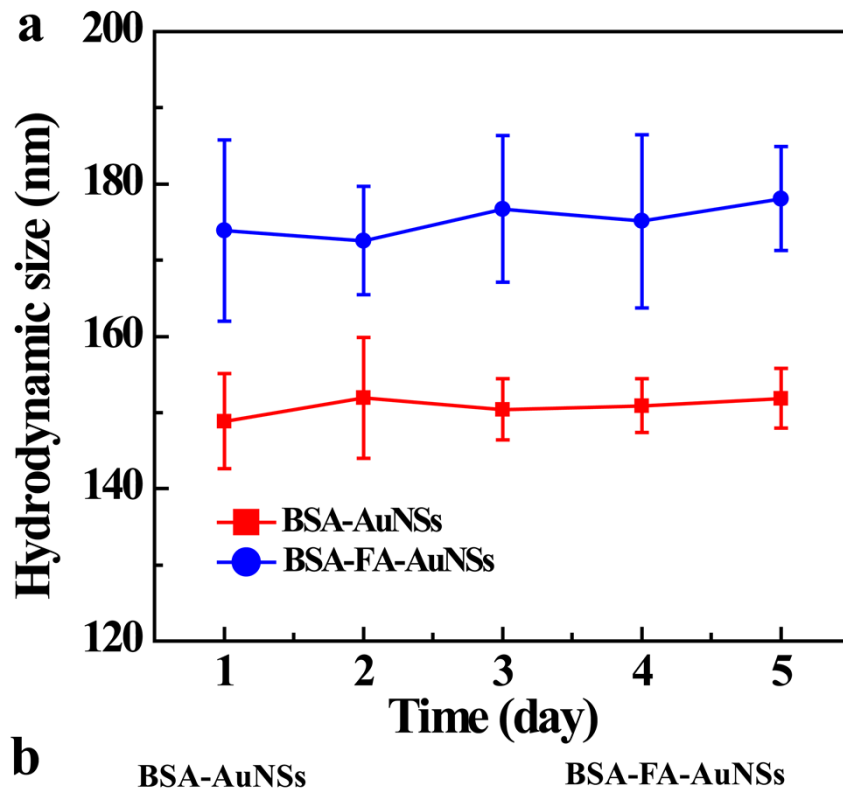

**Fig. S6** Hydrodynamic size of BSA-AuNSs and BSA-FA-AuNSs dispersed in water at different storage time (a). The photos of BSA-AuNSs and BSA-FA-AuNSs dispersed in water, PBS and cell culture medium (containing 10% FBS) over a period of 5 d (b).
